# Supplementary material for: Effects of Storage Temperature on Indica-Japonica Hybrid Rice Metabolites, Analyzed Using Liquid Chromatography and Mass Spectrometry
Source: MDPI journal article supplement (doi:10.3390/ijms23137421), 2022-07-04
Supplement: s1 [file s1]

Supplementary Files

**Effects of storage temperature on indica-japonica hybrid rice metabolites, analyzed using liquid chromatography and mass spectrometry**

Lin Zhu<sup>a†</sup>, Yu Tian<sup>b†</sup>, Ling Jiangang<sup>a</sup>, Xue Gong<sup>b</sup>, Jing Sun<sup>b\*</sup> and Li-Tao Tong<sup>b\*</sup>

<sup>a</sup>Institute of Agricultural Products Processing, Key Laboratory of Preservation engineering of Agricultural Products, Ningbo Academy of Agricultural Sciences, Ningbo, Zhejiang 315040, China

<sup>b</sup>Institute of Food Science and Technology, Chinese Academy of Agricultural Sciences/Key Laboratory of Agro-Products Processing Ministry of Agriculture, Beijing, 100193, China

<sup>†</sup>Co first author

\* Correspondence: author. Tel/Fax: +86-10-6281-7417 E-mail address: tonglitaotao@caas.cn (L. T. Tong); Tel/Fax: +86-10-6281-0295 E-mail address: ycsunjing2008@126.com (J. Sun)

| No.              | Content                                                                                                       |
|------------------|---------------------------------------------------------------------------------------------------------------|
| <b>Table S1</b>  | Compound names, retention times, exact mass, and KEGG IDs of detected compounds in UPLC-Qtrap-MS.             |
| <b>Figure S1</b> | Overlaid total ion current chromatograms (TICs) of all QC samples.                                            |
| <b>Figure S2</b> | Overlaid extracted ion current chromatograms (EICs) of internal standard 2-chlorophenylalanine in QC samples. |

**Table S1.** Compound names, retention times, exact mass, and KEGG IDs of detected compounds in UPLC-Qtrap-MS.

| No. | compound name                                                                     | Rt(min) | KEGG_ID | EXACT_MASS |
|-----|-----------------------------------------------------------------------------------|---------|---------|------------|
| 1   | 5,7-Dihydroxyisoflavone                                                           | 14.24   | C02168  | 241.1103   |
| 2   | 8-Azabicyclo-3.2.1-octan-3-ol                                                     | 14.09   |         | 127.0997   |
| 3   | Astrocasine                                                                       | 13.94   | C10130  | 310.2045   |
| 4   | 5-Tricosyl-1,3-benzenediol                                                        | 13.85   |         | 432.3967   |
| 5   | Oxoglaucine                                                                       | 13.83   |         | 351.1107   |
| 6   | Venlafaxine                                                                       | 13.73   | C07187  | 277.2042   |
| 7   | Sitostenone                                                                       | 13.71   |         | 412.3705   |
| 8   | 25-Hydroxyvitamin D2-25-glucuronide;25-Hydroxyvitamin D2<br>25-(beta-glucuronide) | 13.7    | C03033  | 588.3662   |
| 9   | Allocriptopine                                                                    | 13.59   | C02134  | 369.1576   |
| 10  | Astaxanthin                                                                       | 13.56   | C08580  | 596.3866   |
| 11  | Mulberrofuran Q                                                                   | 13.28   |         | 592.1370   |
| 12  | Broussonin C                                                                      | 13.23   | C09524  | 312.1725   |
| 13  | 1-Isomangostin                                                                    | 13.16   | C10071  | 410.1729   |
| 14  | Lutein                                                                            | 13.14   | C08601  | 568.4280   |
| 15  | 8,9-DiHETrE                                                                       | 13.03   | C14773  | 338.2457   |
| 16  | Tetrodotoxin                                                                      | 12.98   | C11692  | 319.1016   |
| 17  | Deguelin                                                                          | 12.92   | C10417  | 394.1416   |
| 18  | Palmitic acid                                                                     | 12.92   | C00249  | 256.2402   |
| 19  | Palmitoylethanolamide                                                             | 12.61   | C16512  | 299.2824   |
| 20  | Abyssinone V                                                                      | 12.6    | C09319  | 408.1937   |
| 21  | 7-(4-Hydroxyphenyl)-1-phenyl-4-hepten-3-one                                       | 12.53   |         | 280.1463   |
| 22  | Betulin                                                                           | 12.32   | C08618  | 442.3811   |
| 23  | 3-O-Acetyl-11-keto-beta-boswellic acid                                            | 12.3    |         | 512.3502   |
| 24  | Levamisole                                                                        | 12.04   | C07070  | 204.0721   |
| 25  | Shionone                                                                          | 12      | C17966  | 426.3862   |
| 26  | Methyl linoleate                                                                  | 12      |         | 294.2559   |
| 27  | Cinchonine                                                                        | 11.99   | C06528  | 294.1732   |
| 28  | (-)-Cinchonidine                                                                  | 11.99   | C11379  | 294.1732   |
| 29  | 6-Gingerol; 6-Gingerol;[6]-Gingerol;Gingerol                                      | 11.99   | C10462  | 294.1831   |
| 30  | 9-OxoODE                                                                          | 11.98   | C14766  | 294.2195   |
| 31  | 13-HPODE;13-L-Hydroperoxylinoleic acid                                            | 11.98   | C04717  | 312.2301   |
| 32  | Colneleate                                                                        | 11.97   | C19827  | 294.2195   |
| 33  | (10E,12Z)-(9S)-9-Hydroperoxyoctadeca-10,12-dienoic acid                           | 11.96   | C14827  | 312.2301   |
| 34  | N1-(alpha-D-ribosyl)-5,6-dimethyl-benzimidazole                                   | 11.88   | C05775  | 278.1267   |
| 35  | Cannabinol                                                                        | 11.75   | C07580  | 310.1933   |
| 36  | Sterebin A                                                                        | 11.75   |         | 310.2144   |
| 37  | Karanjin                                                                          | 11.67   |         | 292.0736   |

|    |                                                 |       |               |          |
|----|-------------------------------------------------|-------|---------------|----------|
| 38 | Lansiumarin A                                   | 11.65 |               | 352.1311 |
| 39 | p-Cymene                                        | 11.62 | C06575        | 134.1096 |
| 40 | Exemestane                                      | 11.61 | C08162        | 296.1776 |
| 41 | Progesterone                                    | 11.6  | C00410        | 314.2246 |
| 42 | Bisabolol oxide A                               | 11.5  | C16773        | 238.1933 |
| 43 | 13(S)-HPOT                                      | 11.47 | C04785        | 310.2144 |
| 44 | Ginkgolic acid C17:1                            | 11.46 |               | 374.2821 |
| 45 | (13E)-11a-Hydroxy-9,15-dioxoprost-13-enoic acid | 11.44 | C04654        | 352.2250 |
| 46 | Methyl tanshinonate                             | 11.43 |               | 338.1154 |
| 47 | Levonorgestrel                                  | 11.29 | C08149        | 312.2089 |
| 48 | Valerenic acid                                  | 11.24 | C09743        | 234.1620 |
| 49 | Biochanin A                                     | 11.21 | C00814        | 284.0685 |
| 50 | 1-Phenylethanol                                 | 10.56 | C07112        | 122.0732 |
| 51 | Geranylacetone                                  | 10.51 | C13297        | 330.2923 |
| 52 | Liquiritigenin                                  | 9.65  | C09762        | 256.0736 |
| 53 | Anacrotine                                      | 9.55  | C10277        | 351.1682 |
| 54 | Picrocrocin                                     | 9.25  | C17055        | 330.1679 |
| 55 | Diosmetin                                       | 9.15  | C10038        | 300.0634 |
| 56 | Macamide B                                      | 8.85  |               | 345.3032 |
| 57 | Pinobanksin                                     | 8.14  | C09826        | 272.0685 |
| 58 | 3-(2,3-Dihydroxyphenyl)propanoate               | 7.99  | C04044        | 182.0579 |
| 59 | Fulvine                                         | 7.99  | C10304        | 309.1576 |
| 60 | (-)-Sativan                                     | 7.89  | C10526        | 286.1205 |
| 61 | Herniarin                                       | 7.69  | C09268        | 176.0473 |
| 62 | Chrysophanol;Chrysophanic acid; Chrysophanol    | 7.46  | C10315        | 254.0579 |
| 63 | 2-Hydroxyxanthone                               | 7.27  |               | 212.0473 |
| 64 | Peonidin-3-glucoside                            | 6.93  | C12141        | 462.1162 |
| 65 | Bovinic acid                                    | 6.86  | C04056        | 280.2402 |
| 66 | Indole-3-carboxaldehyde                         | 6.73  | C08493        | 145.0528 |
| 67 | Lumichrome                                      | 6.7   | C01727        | 242.0804 |
| 68 | Diosmin                                         | 6.59  | C10039        | 608.1741 |
| 69 | Rhoifolin                                       | 6.5   | C12627        | 578.1636 |
| 70 | D-Arabinose 5-phosphate                         | 6.29  | C01112        | 230.0192 |
| 71 | Okanin                                          | 5.99  | C08724        | 288.0634 |
| 72 | Vanillin                                        | 5.9   | C00755        | 152.0473 |
| 73 | Eurycomalactone;Ingenol                         | 5.79  | C08759;C09112 | 348.1573 |
| 74 | 3-Ethoxy-4-hydroxybenzaldehyde;Ethyl salicylate | 5.72  |               | 166.0630 |
| 75 | indolin-2-one                                   | 5.67  | C12312        | 133.0528 |
| 76 | 3-Indoleacetonitrile                            | 5.46  | C02938        | 156.0687 |
| 77 | Terpinine-4-ol                                  | 5.45  | C17073        | 154.1358 |
| 78 | 2-Hydroxycinnamic acid                          | 5.44  | C01772        | 164.0473 |
| 79 | 3-Methoxy-4,5-methylenedioxycinnamaldehyde      | 5.04  |               | 206.0579 |
| 80 | 4-Sulfobenzoate                                 | 4.68  | C02236        | 201.9936 |

|     |                                                                                 |      |                      |          |
|-----|---------------------------------------------------------------------------------|------|----------------------|----------|
| 81  | Caffeine                                                                        | 4.5  | C07481               | 194.0804 |
| 82  | Methyl gallate                                                                  | 4.44 |                      | 184.0372 |
| 83  | N-Feruloyl putrescine                                                           | 4.33 | C10497               | 264.1474 |
| 84  | trans-Zeatin-riboside                                                           | 4.31 | C16431               | 351.1543 |
| 85  | 3,4-Dihydroxybenzaldehyde;Protocatechuic aldehyde;<br>3,4-Dihydroxybenzaldehyde | 4.29 | C16700               | 138.0317 |
| 86  | Cinnamyl cinnamate                                                              | 4.26 |                      | 264.1150 |
| 87  | Esculin                                                                         | 4.23 | C09264               | 340.0794 |
| 88  | Carbendazim                                                                     | 4.1  | C10897               | 191.0695 |
| 89  | Indole                                                                          | 3.82 | C00463               | 117.0578 |
| 90  | Deethylatrazine                                                                 | 3.81 | C06559               | 187.0625 |
| 91  | 3-Methylindole                                                                  | 3.81 | C08313               | 131.0735 |
| 92  | Vasicine                                                                        | 3.76 | C10733               | 188.0950 |
| 93  | Syringic acid                                                                   | 3.57 | C10833               | 198.0528 |
| 94  | Coniferyl alcohol                                                               | 3.27 | C00590               | 180.0786 |
| 95  | N-Nitroso-pyrrolidine                                                           | 3.11 | C19285               | 100.0637 |
| 96  | Calystegine B2                                                                  | 2.95 | C10851               | 175.0845 |
| 97  | L-Phenylalanine;D-(+)-Phenylalanine;DL-Phenylalanine                            | 2.82 | C00079;C02265;C02057 | 165.0790 |
| 98  | Phenethylamine                                                                  | 2.82 | C05332               | 121.0891 |
| 99  | 5-(3-Pyridyl)-2-hydroxytetrahydrofuran                                          | 2.8  | C19578               | 165.0790 |
| 100 | 5-Phenyl-1,3-oxazinane-2,4-dione                                                | 2.8  | C16596               | 191.0582 |
| 101 | 4-Methyl-5-thiazoleethanol                                                      | 2.66 | C04294               | 143.0405 |
| 102 | N1-Methyl-2-pyridone-5-carboxamide                                              | 2.63 | C05842               | 152.0586 |
| 103 | Adenosine                                                                       | 2.58 | C00212               | 267.0968 |
| 104 | 2(3H)-Benzothiazolethione                                                       | 2.57 | C14437               | 166.9863 |
| 105 | N,N-Dimethyl-1,4-phenylenediamine                                               | 2.56 | C04203               | 136.1000 |
| 106 | Vidarabine                                                                      | 2.28 | C07195               | 267.0968 |
| 107 | Guanosine 3',5'-cyclic monophosphate                                            | 2.26 | C00942               | 345.0474 |
| 108 | Adenosine 2',3'-cyclic phosphate                                                | 1.86 | C02353               | 329.0525 |
| 109 | Denudatine                                                                      | 1.59 | C08680               | 343.2511 |
| 110 | 2-(Methylamino)benzoic acid                                                     | 1.58 | C03005               | 151.0633 |
| 111 | 7-Methylguanine                                                                 | 1.56 | C02242               | 165.0651 |
| 112 | Pyridoxine                                                                      | 1.55 | C00314               | 169.0739 |
| 113 | (2E)-Decenoyl-ACP;L-Pipecolic acid;Pipecolic acid                               | 1.47 | C03969;C00408        | 129.0790 |
| 114 | Glycerophosphocholine                                                           | 1.47 | C00670               | 257.1028 |
| 115 | cis-Aconitic acid                                                               | 1.46 | C00417               | 174.0164 |
| 116 | 3-Hydroxy-2-methylpyridine                                                      | 1.44 |                      | 109.0528 |
| 117 | CYS-GLY;Cysteinylglycine                                                        | 1.38 | C01419               | 178.0412 |
| 118 | 2-Picolinic acid                                                                | 1.33 | C10164               | 123.0320 |
| 119 | 4-Guanidinobutyric acid                                                         | 1.31 | C01035               | 145.0851 |
| 120 | 4-Nitrocatechol                                                                 | 1.24 | C02235               | 155.0219 |
| 121 | 3-Octyl alcohol                                                                 | 1.23 | C17144               | 130.1358 |
| 122 | Maltotriose                                                                     | 1.23 | C01835               | 504.1690 |

|     |                                |      |               |          |
|-----|--------------------------------|------|---------------|----------|
| 123 | Ethyl isovalerate              | 1.19 | C12290        | 130.0994 |
| 124 | 5-Aminovaleric acid            | 1.11 | C00431        | 117.0790 |
| 125 | Nicotinamide                   | 1.01 | C00153        | 122.0480 |
| 126 | 2-Aminoisobutyric acid         | 0.98 | C03665        | 103.0633 |
| 127 | Maltol                         | 0.9  | C11918        | 126.0317 |
| 128 | Sucrose                        | 0.89 | C00089        | 342.1162 |
| 129 | Trigonelline                   | 0.82 | C01004        | 137.0477 |
| 130 | Turanose                       | 0.79 | C19636        | 342.1162 |
| 131 | Lactulose                      | 0.77 | C07064        | 342.1162 |
| 132 | D-Proline                      | 0.76 | C00763        | 115.0633 |
| 133 | dUMP                           | 0.76 | C00365        | 308.0410 |
| 134 | D-Aspartic acid                | 0.76 | C00402        | 133.0375 |
| 135 | 5-Methyl-2-furaldehyde         | 0.76 | C11115        | 110.0368 |
| 136 | alpha-D-Glucose;D-Tagatose     | 0.76 | C00267;C00795 | 180.0634 |
| 137 | 2-Hydroxyethanesulfonate       | 0.76 | C05123        | 125.9987 |
| 138 | Beta-D-Fructose 2-phosphate    | 0.75 | C03267        | 260.0297 |
| 139 | Gemcitabine                    | 0.75 | C07650        | 263.0718 |
| 140 | Proline betaine                | 0.74 | C10172        | 143.0946 |
| 141 | l-Kestose                      | 0.74 | C03661        | 504.1690 |
| 142 | Ethyl caproate                 | 0.74 |               | 144.1150 |
| 143 | Proline;L-Proline              | 0.73 | C00148        | 115.0633 |
| 144 | Nicotinic acid                 | 0.73 | C00253        | 123.0320 |
| 145 | Stachyose                      | 0.73 | C01613        | 666.2219 |
| 146 | Streptozotocin                 | 0.72 | C07313        | 265.0910 |
| 147 | Kojibiose                      | 0.72 | C19632        | 342.1162 |
| 148 | Methylimidazole acetaldehyde   | 0.71 | C05827        | 124.0637 |
| 149 | Cytidine                       | 0.7  | C00475        | 243.0855 |
| 150 | L-Acetylcarnitine              | 0.69 | C02571        | 203.1158 |
| 151 | L-Pipecolic acid               | 0.69 | C00408        | 129.0790 |
| 152 | Pregabalin                     | 0.69 |               | 159.1259 |
| 153 | O-Acetyethanolamine            | 0.67 |               | 103.0633 |
| 154 | Phosphorylcholine              | 0.67 | C00588        | 183.0660 |
| 155 | L-Homoserine                   | 0.67 | C00263        | 119.0582 |
| 156 | Pyrrolidonecarboxylic acid     | 0.67 | C02237        | 129.0426 |
| 157 | 4-Aminobutyric acid            | 0.66 | C00334        | 103.0633 |
| 158 | L-Citrulline;L-Citrulline      | 0.66 | C00327        | 175.0957 |
| 159 | L-Glutamic acid                | 0.66 | C00025        | 147.0532 |
| 160 | D-Serine                       | 0.66 | C00740        | 105.0426 |
| 161 | D-Glutamine                    | 0.66 | C00819        | 146.0691 |
| 162 | (S)-2-Aceto-2-hydroxybutanoate | 0.66 | C06006        | 146.0579 |
| 163 | Sulforaphane                   | 0.66 |               | 177.0282 |
| 164 | Aminomalonic acid              | 0.65 | C00872        | 119.0219 |
| 165 | D-alpha-Aminobutyric acid      | 0.65 | C02261        | 103.0633 |

|     |                        |      |               |          |
|-----|------------------------|------|---------------|----------|
| 166 | L-Threonine            | 0.64 | C00188        | 119.0582 |
| 167 | L-Alanine;DL-Alanine   | 0.64 | C00041;C01401 | 89.0477  |
| 168 | L-Lysine;L-Glutamine   | 0.64 | C00047;C00064 | 146.1055 |
| 169 | 2-Hydroxybutanoic acid | 0.64 | C05984        | 104.0473 |
| 170 | Maltotetraose          | 0.64 | C02052        | 666.2219 |
| 171 | 4-Hydroxybutanoic acid | 0.64 | C00989        | 104.0473 |
| 172 | L-Aspartic acid        | 0.63 | C00049        | 133.0375 |
| 173 | 3-Methy-L-histidine    | 0.61 | C01152        | 169.0851 |
| 174 | L-Arginine             | 0.6  | C00062        | 174.1117 |
| 175 | 5-oxoproline           | 0.56 | C01879        | 129.0426 |
| 176 | Pimelic acid           | 0.55 | C02656        | 160.0736 |
| 177 | Ergothioneine          | 0.52 | C05570        | 229.0885 |

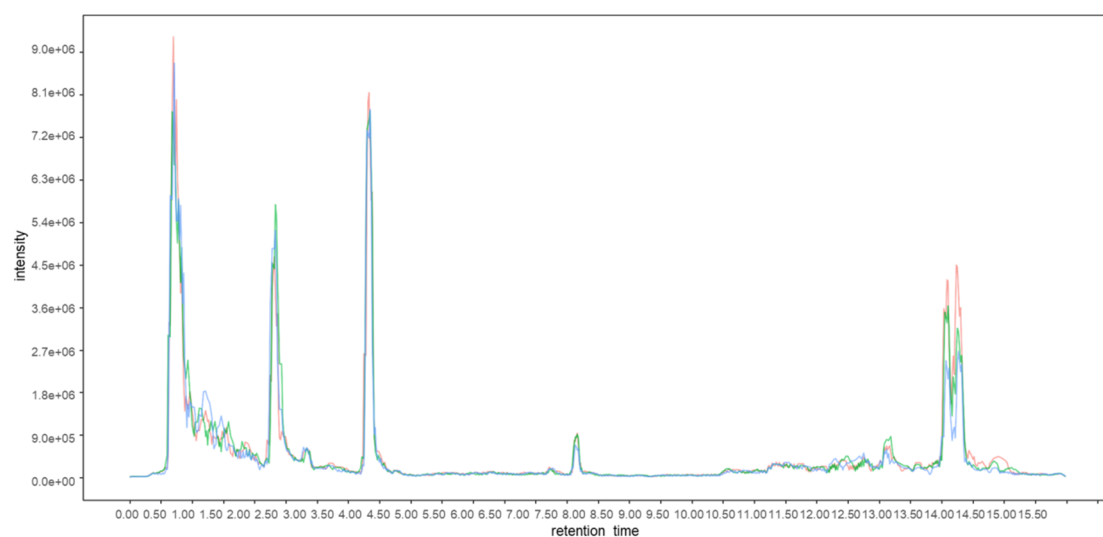

**Figure S1.** Overlaid total ion current chromatograms (TICs) of all QC samples.

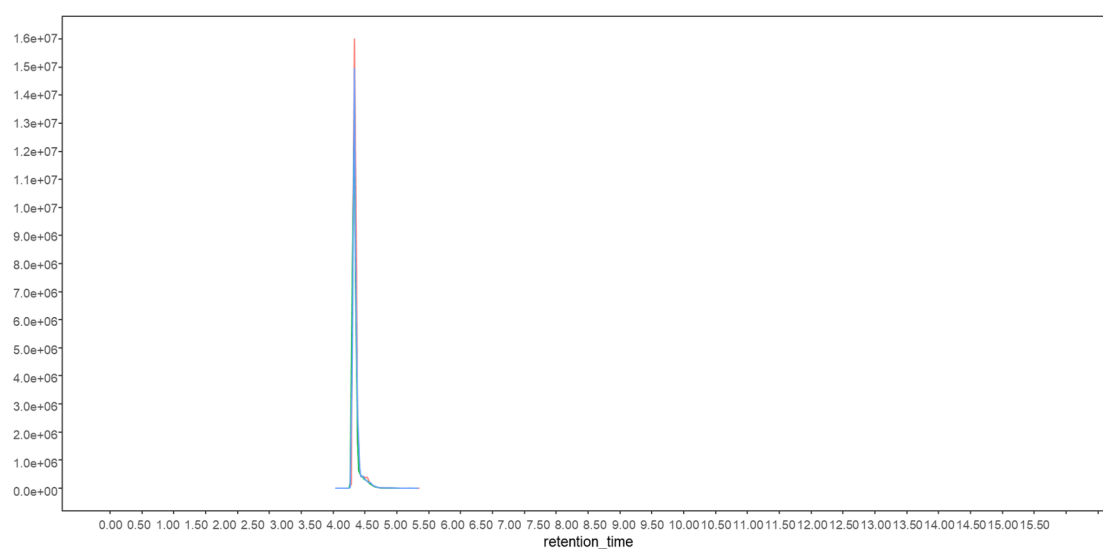

**Figure S2.** Overlaid extracted ion current chromatograms (EICs) of internal standard 2-chlorophenylalanine in QC samples.
